# Supplementary material for: Buckypaper-Based Nanostructured Sensor for Port Wine Analysis
Source: MDPI journal article supplement (doi:10.3390/s22249732), 2022-12-12
Supplement: s1 [file s1]

## Supplementary Materials

# Buckypaper-Based Nanostructured Sensor for Port Wine Analysis

Luiza Ferreira <sup>1</sup>, Paula Pinheiro <sup>2</sup>, Newton Barbosa Neto <sup>1</sup> and Marcos Reis <sup>1,2,\*</sup>

<sup>1</sup> Programa de Pós-Graduação em Ciência e Engenharia de Materiais, Universidade Federal do Pará, Ananindeua 67130-660, PA, Brazil

<sup>2</sup> Programa de Pós-Graduação em Engenharia de Recursos Naturais da Amazônia, Instituto de Tecnologia, Universidade Federal do Pará, Belem 66075-110, PA, Brazil

\* Correspondence: marcosallan@ufpa.br

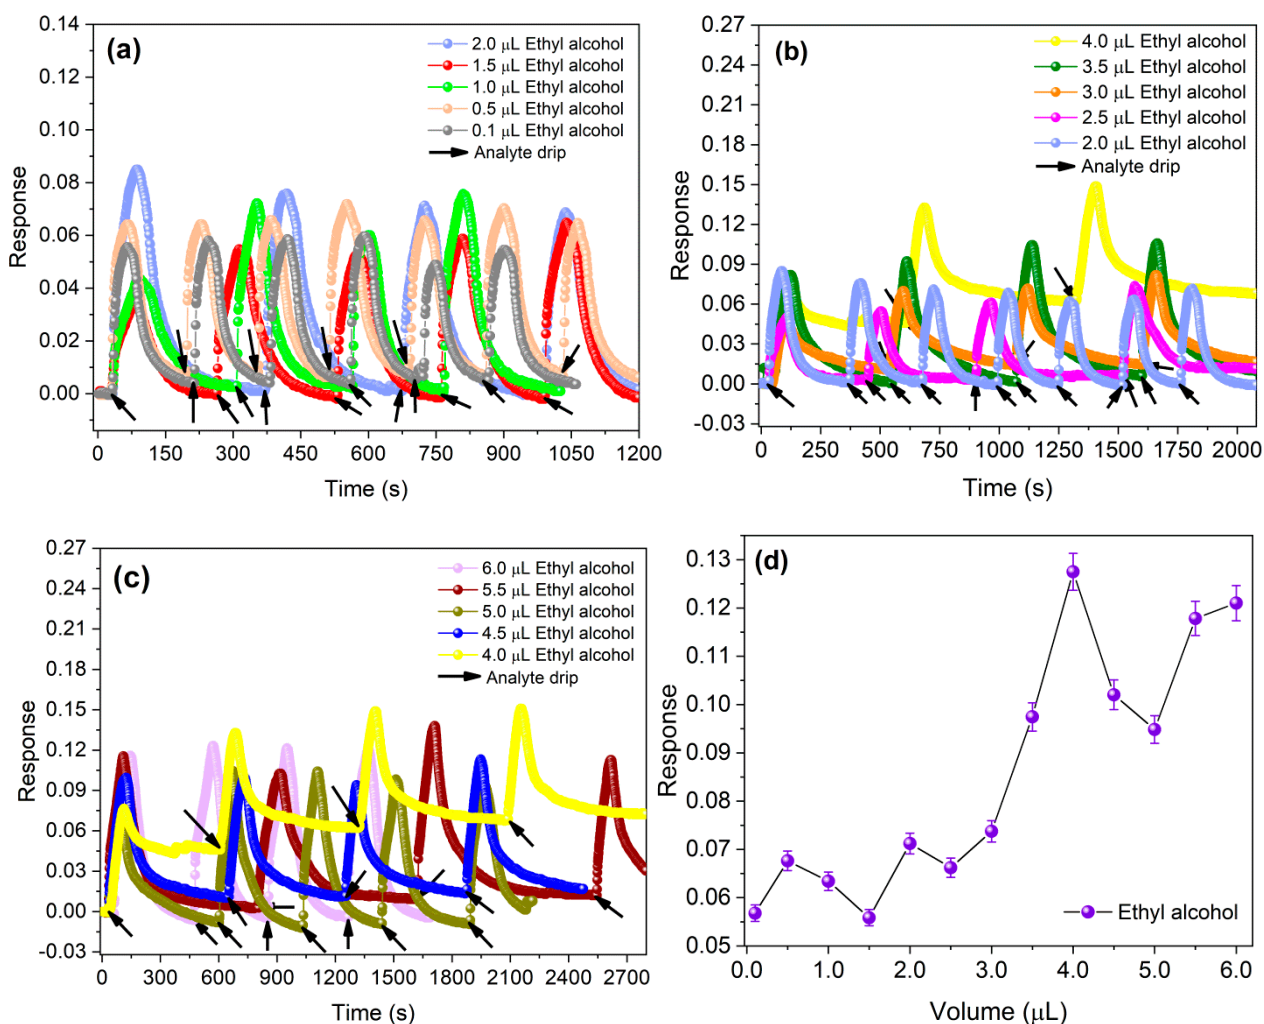

**Figure S1.** Dynamic response of the sensor in the presence of volumes of ethyl alcohol in (a) 0.1 to 2.0 μL, (b) 2.0 to 4.0 μL and (c) 4.0 to 6.0 μL demonstrating the best performance to 4.0 μL of solvent. Comparative analysis of the response in (d) shows  $0.12 \pm 0.03$  for the volume of 4.0 μL of ethyl alcohol.

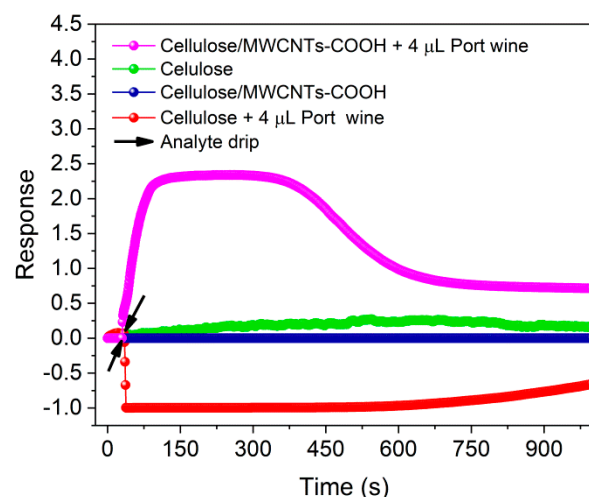

**Figure S2.** Comparative response curves for samples of cellulose without MWCNTs-COOH (filter paper) and cellulose with MWCNTs-COOH (buckypaper) without and after exposure to 4  $\mu$ L of unadulterated Port wine.

PCA provides an estimate of sensor distinguishability by projecting points into distinct graph quadrants. However, for a complete PCA analysis, it would be necessary to expose the sensor to more measurements for each analyte, thus generating clusters of points that would allow the visualization of existing patterns of similarity and differentiation.

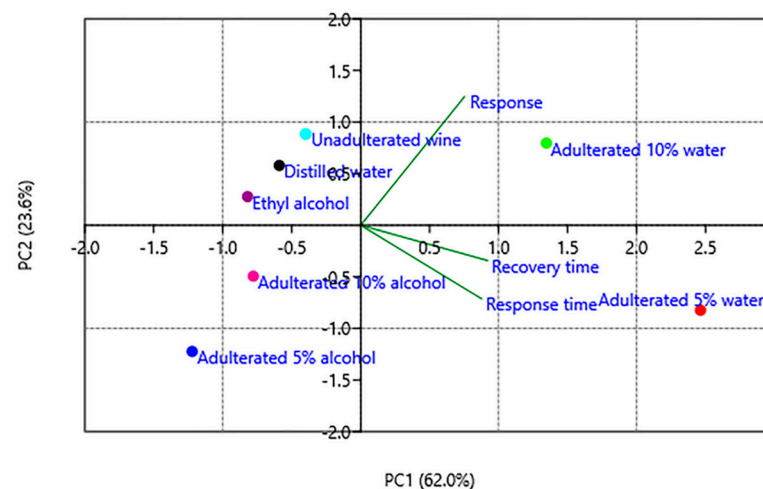

**Figure S3.** PCA Biplot for 4.0  $\mu$ L of distilled water, ethyl alcohol, unadulterated and adulterated Port wine with 5 vol.% and 10 vol.% distilled water and ethyl alcohol as a function of the variables response, response time and recovery time showing an indication the distinguishability of the sensor to unadulterated and adulterated Port wine with distilled water and ethyl alcohol.

**Table S1.** Mean of response and recovery times and their respective standard deviations (SD) for different cycles of the sensor in the presence of individual analytes and adulterated Port wine with 5 vol.% and 10 vol.% of distilled water and ethyl alcohol.

| Analyte                 | Response Time (s) | Standard deviation (SD) | Recovery Time (s) | Standard deviation (SD) |
|-------------------------|-------------------|-------------------------|-------------------|-------------------------|
| Distilled water         | 78.0              | 12.72                   | 181.5             | 9.19                    |
| Ethyl alcohol           | 65.5              | 5.74                    | 126.5             | 12.23                   |
| Unadulterated wine      | 95.5              | 31.29                   | 163.0             | 61.11                   |
| Adulterated 5% water    | 2,240             | 763.67                  | 2,688             | 876.81                  |
| Adulterated 10% water   | 103.3             | 70.94                   | 3,035             | 404.75                  |
| Adulterated 5% alcohol  | 10.0              | 3.60                    | 1,030.6           | 116.86                  |
| Adulterated 10% alcohol | 105.0             | 95.0                    | 870.5             | 377.0                   |

**Table S2.** Data extracted via covariance matrix showing the variance explained by each Principal Component (PC).

| PC | Eigenvalue | Variance (%) |
|----|------------|--------------|
| 1  | 186.013    | 62.004       |
| 2  | 0.707915   | 23.597       |
| 3  | 0.431954   | 14.398       |

**Table S3.** Score data for the samples as a function of the three PCs generated.

| Score                   | PC 1     | PC 2     | PC 3     |
|-------------------------|----------|----------|----------|
| Distilled water         | -0.58985 | 0.58009  | 0.39597  |
| Ethyl alcohol           | -0.82017 | 0.27765  | 0.35793  |
| Unadulterated wine      | -0.39834 | 0.88516  | 0.48128  |
| Adulterated 5% water    | 24.634   | -0.82341 | 0.63001  |
| Adulterated 10% water   | 13.463   | 0.79646  | -11.803  |
| Adulterated 5% alcohol  | -12.221  | -12.225  | -0.50166 |
| Adulterated 10% alcohol | -0.77917 | -0.49344 | -0.18325 |
